# Supplementary material
Source: PubMed Central journal article supplement (PMC4600612)
Supplement: NIHMS652233-supplement.pdf [file NIHMS652233-supplement.pdf]

# Supplementary material for “Fiber estimation and tractography in diffusion MRI: Development of simulated brain images and comparison of multi-fiber analysis methods at clinical $b$ -values”

Bryce Wilkins<sup>a,c,d</sup>, Namgyun Lee<sup>a,b</sup>, Niharika Gajawelli<sup>a,c,d</sup>, Meng Law<sup>a,d</sup>, Natasha Leporé<sup>a,c</sup>

<sup>a</sup>Department of Biomedical Engineering, University of Southern California, Los Angeles, CA, United States

<sup>b</sup>Center of Magnetic Resonance Research, Korea Basic Science Institute, Ochang, South Korea

<sup>c</sup>Department of Radiology, Children’s Hospital of Los Angeles, Los Angeles, CA, United States

<sup>d</sup>Department of Radiology, Keck School of Medicine of USC, Los Angeles, CA, United States

This supplement contains details of results presented in the main body of the paper. The material presented here uses the same definitions, acronyms, and color-coding of plots that were introduced therein.

## 1. Single-fiber per voxel estimation

Fig. S1 illustrates the same mean values (filled markers) as in Fig. 3 of the main paper, with error bars to indicate spread. The error bars extend to the mean of values above and below the filled marker.

## 2. Two-fibers per voxel estimation

Figs. S2-S7 illustrate the same mean values (filled markers) as in Figs. 4 and 5 of the main paper, with error bars to indicate spread. The error bars extend to the mean of values above and below the filled marker.

## 3. Three-fibers per voxel estimation

Fig. S8. illustrates the same mean values (filled markers) as in Fig. 6 of the main paper, with error bars to indicate spread. The error bars extend to the mean of values above and below the filled marker.

Overall, Figs S1-S8 show consistent decreases in mean error (filled markers) and spread with increasing number of diffusion-weighting directions,  $N$ , as would be expected. In general the significant reductions in mean error and spread are obtained from  $N = 20$  to  $N = 60$ , with diminishing improvements up to  $N = 120$ .

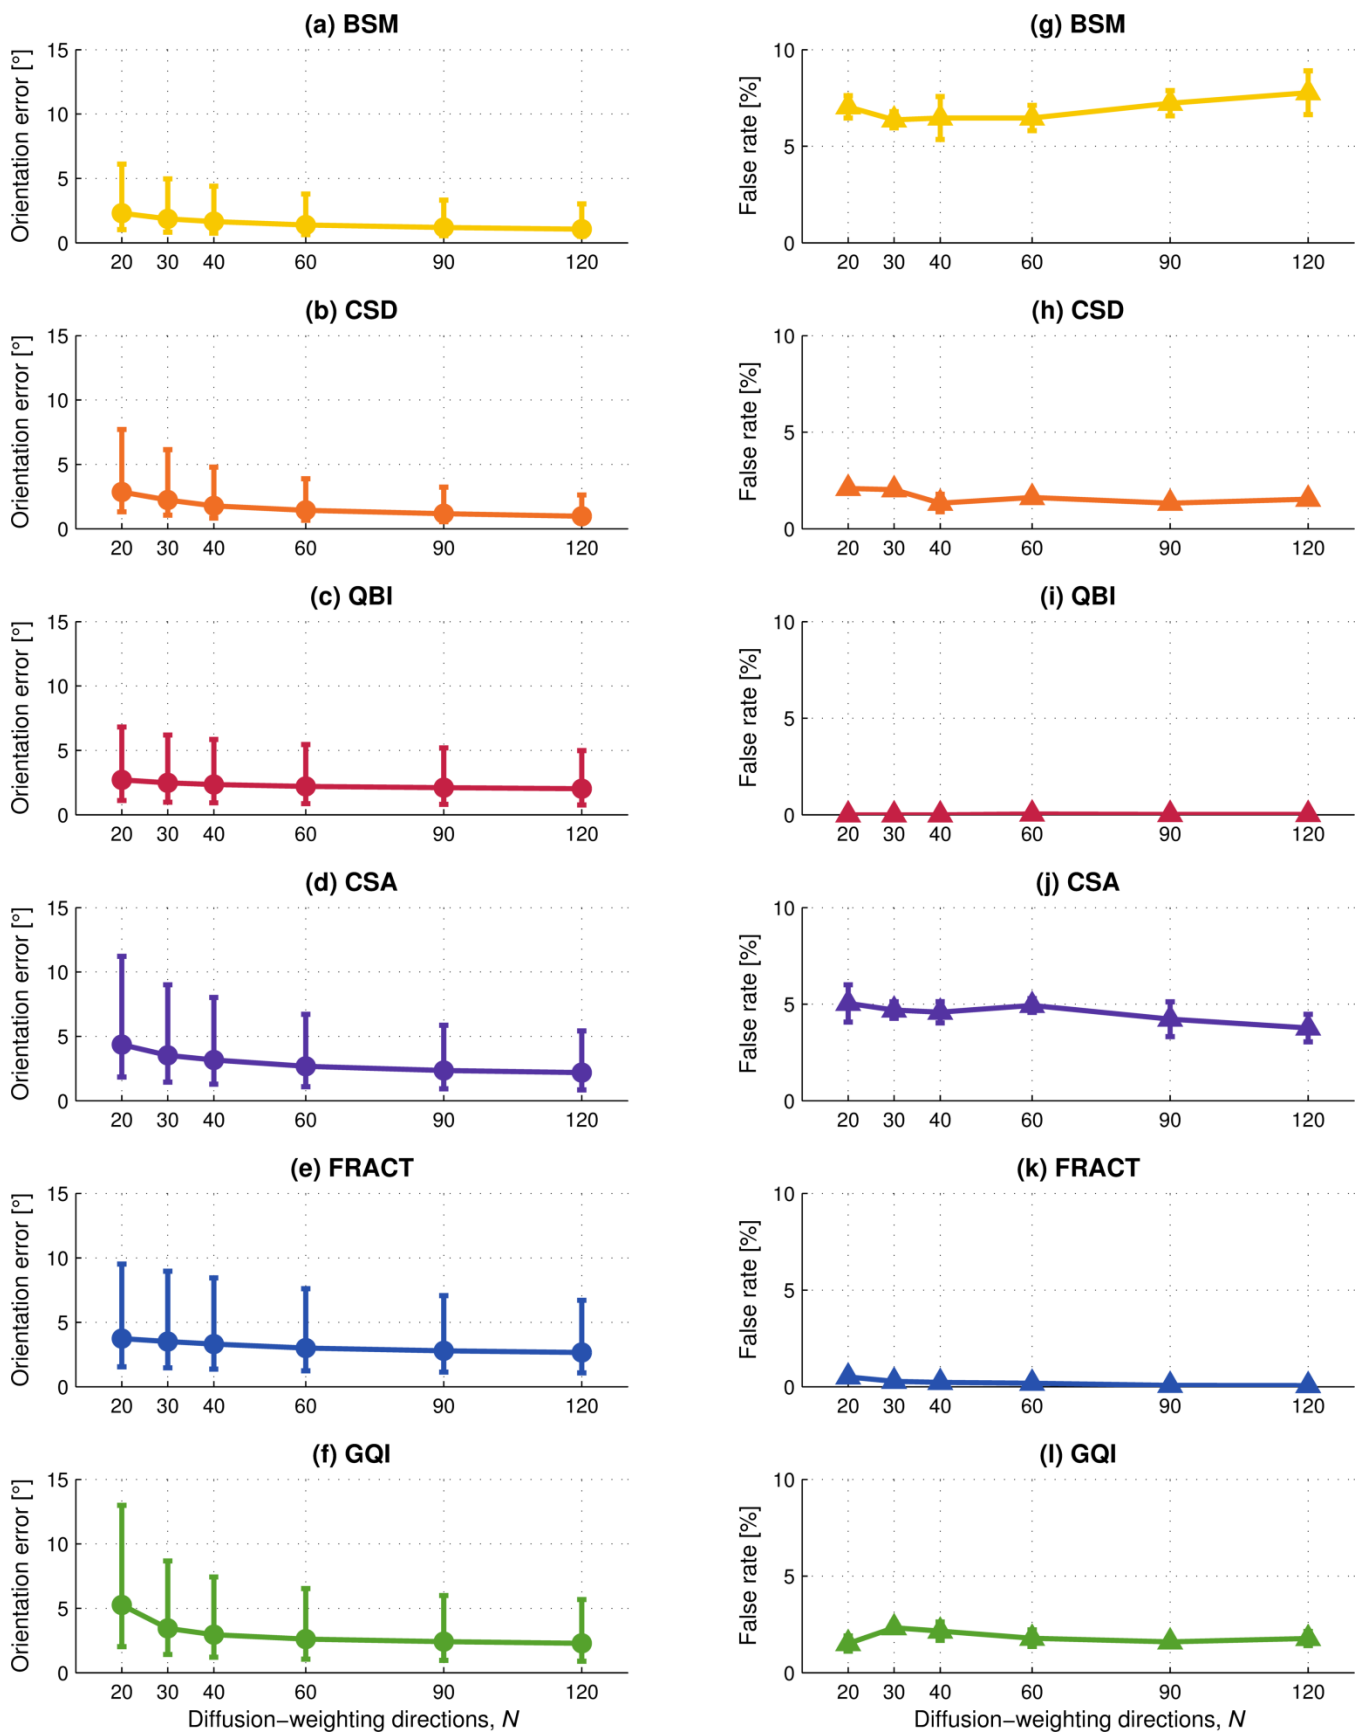

Fig. S1. Single-fiber estimation versus number of diffusion-weighting directions,  $N$ . Error bars extend to the mean of samples above and below the filled marker (mean of all data points). (a)-(f) Individual fiber orientation error for each method. (g)-(l) Corresponding false-positive rate.

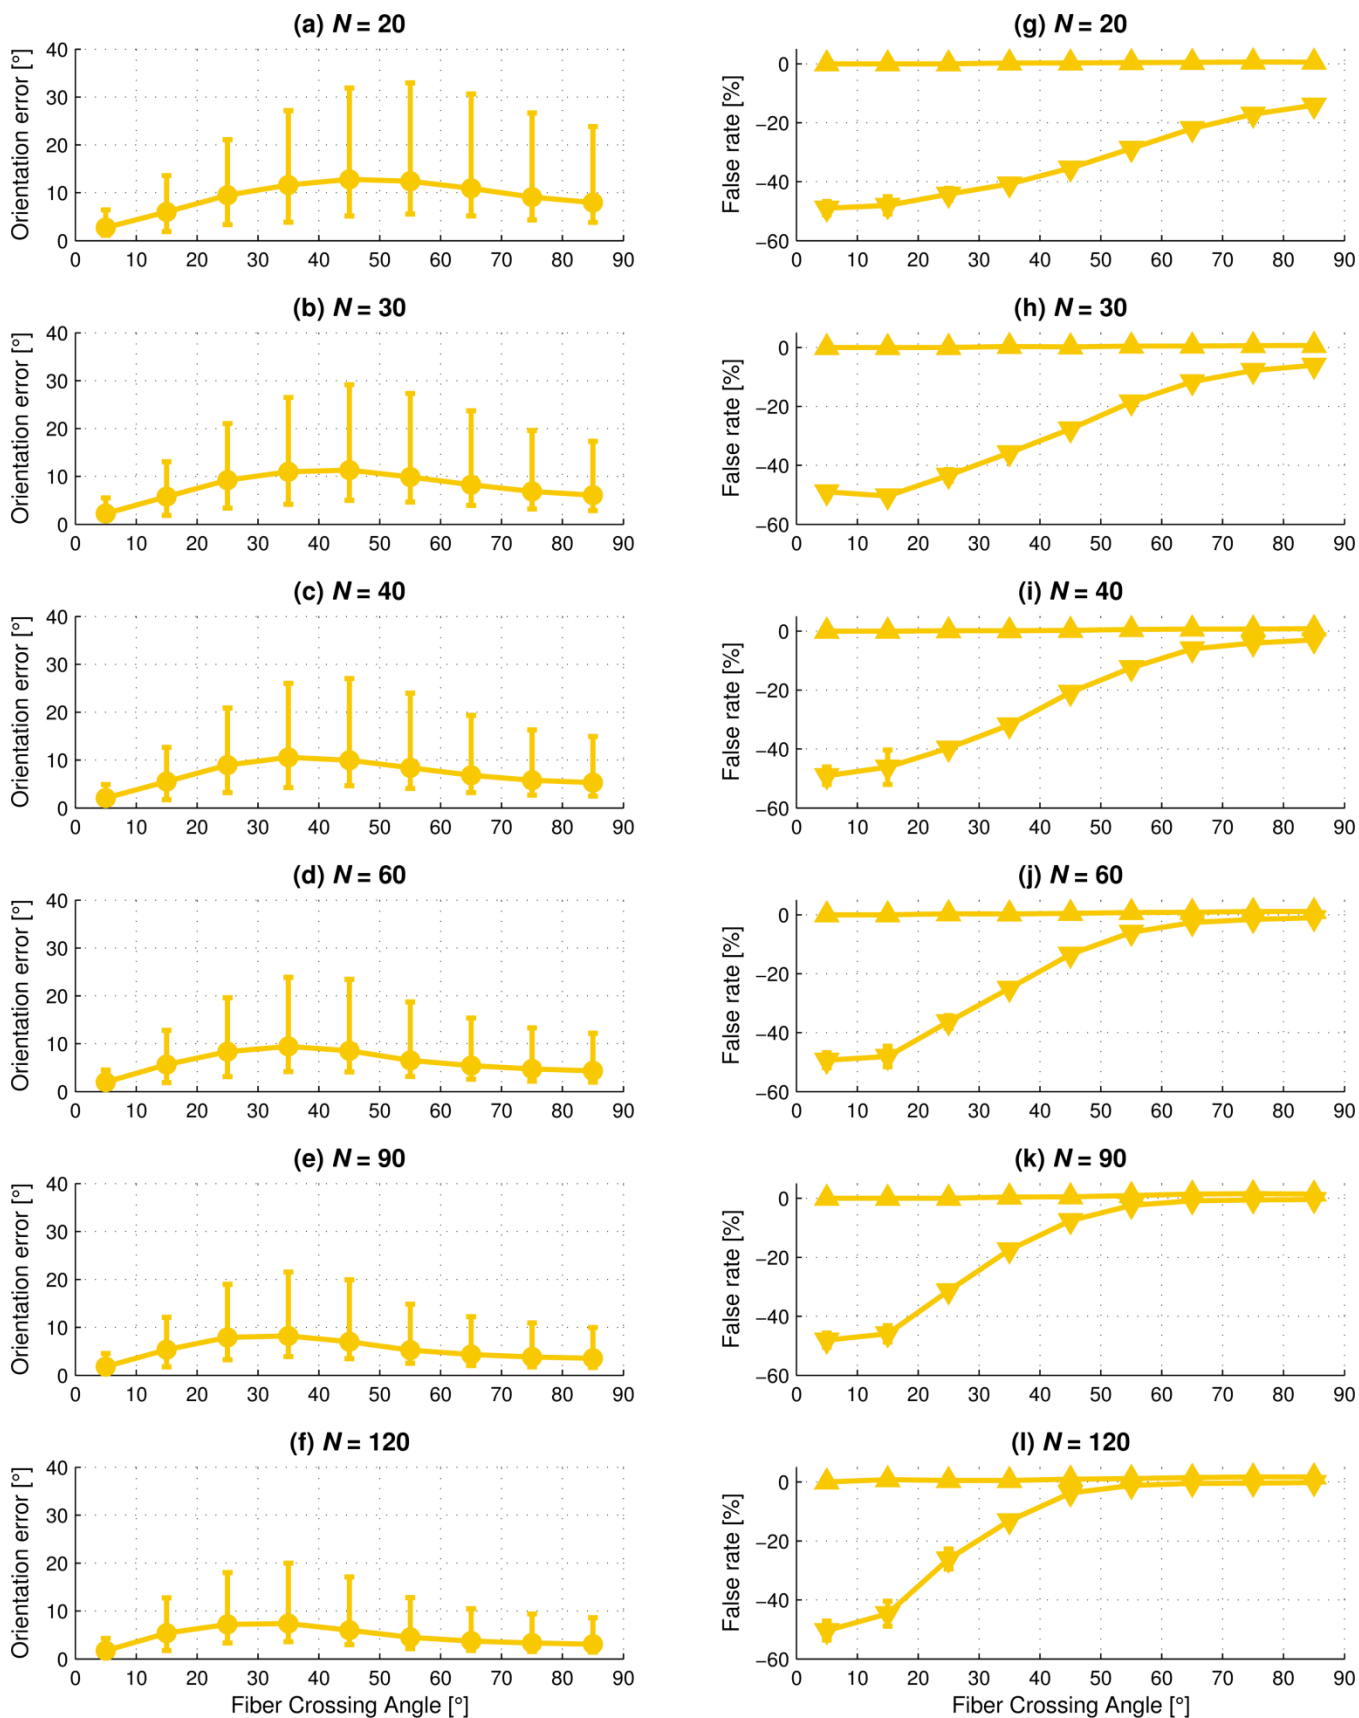

Fig. S2. Two-fiber estimation versus fiber crossing angle, for BSM method. Error bars extend to the mean of samples above and below the filled marker (mean of all data points). (a)-(f) Individual fiber orientation error, with increasing  $N$ . (g)-(l) Corresponding false-positive (▲) and false-negative (▼) rates.

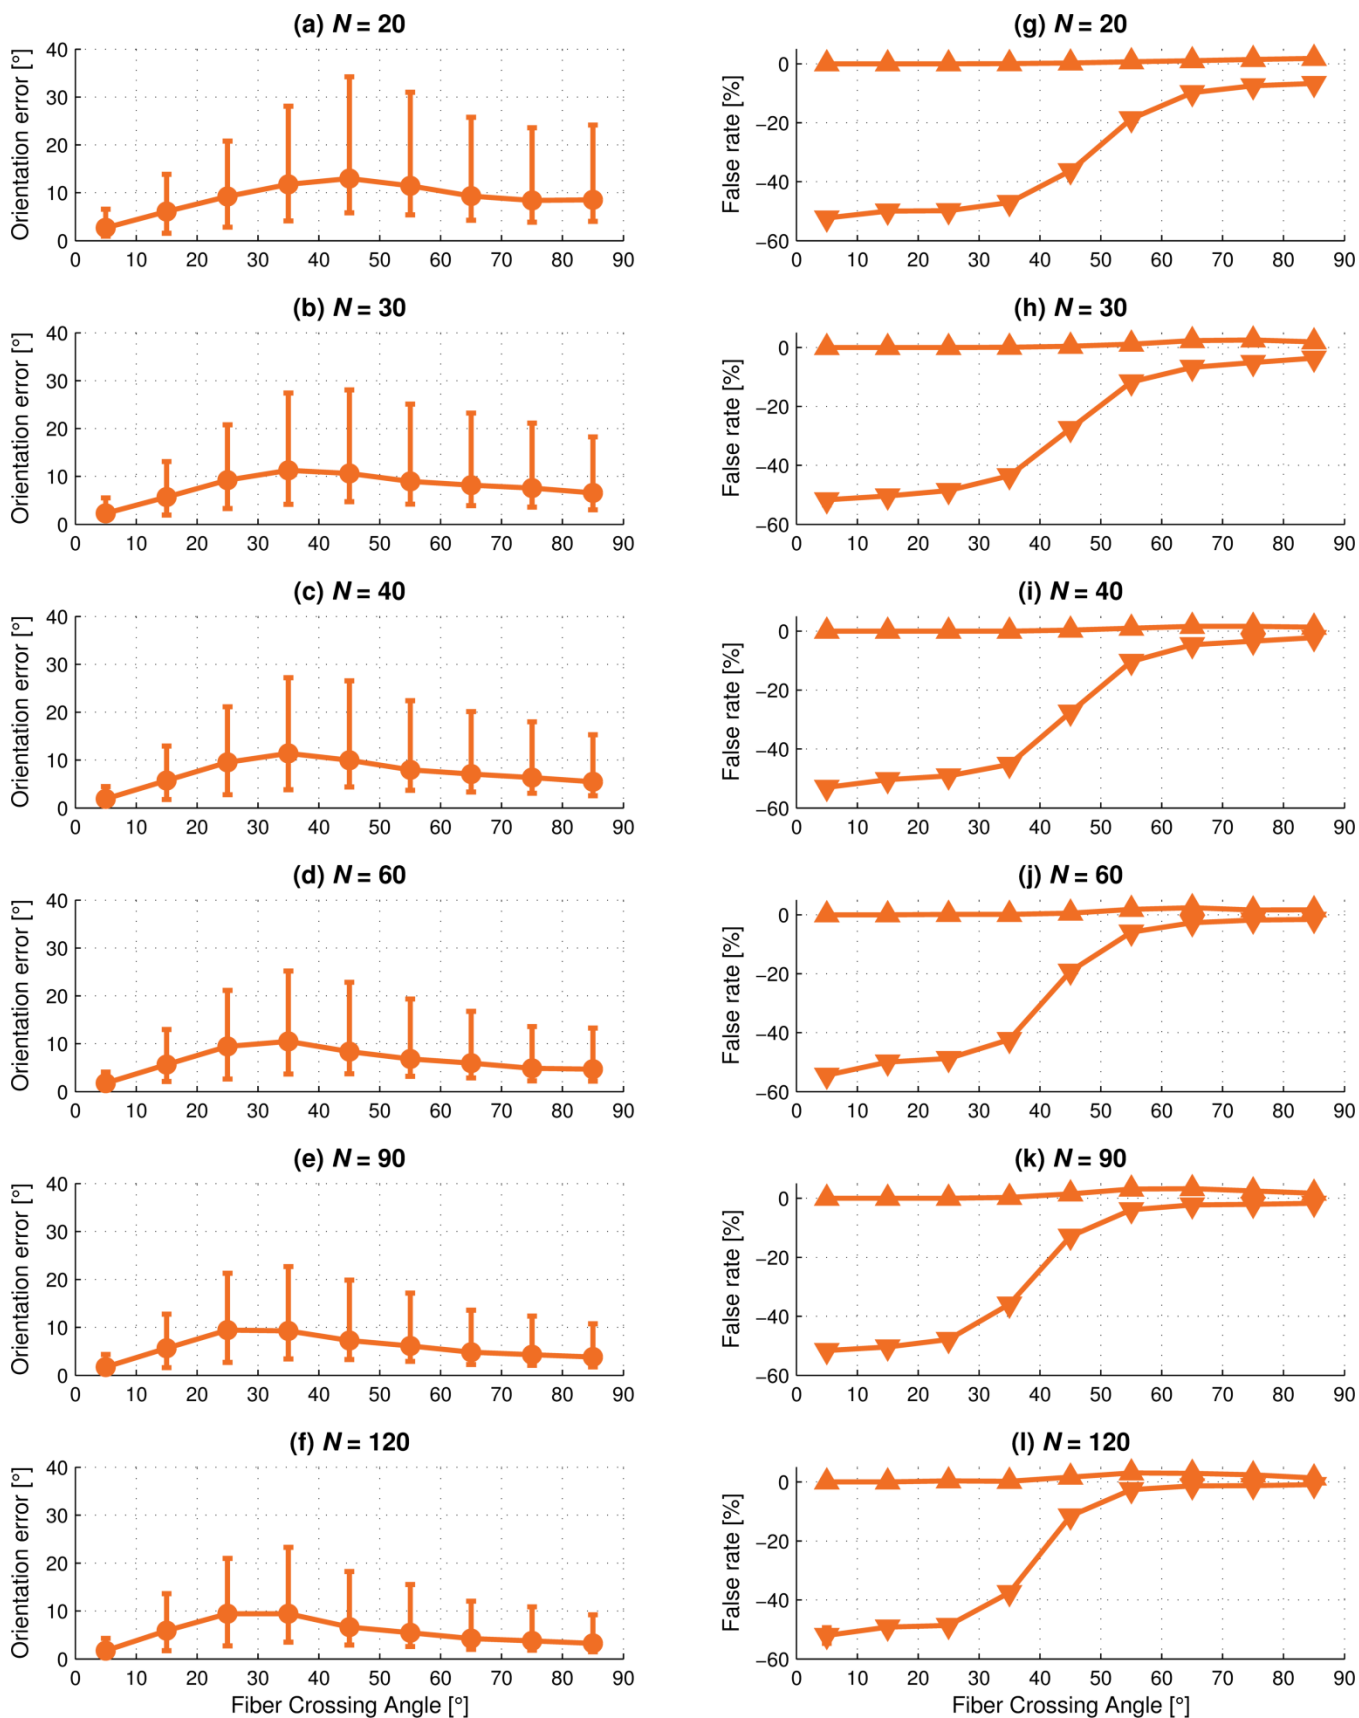

Fig. S3. Two-fiber estimation versus fiber crossing angle, for CSD method. Error bars extend to the mean of samples above and below the filled marker (mean of all data points). (a)-(f) Individual fiber orientation error, with increasing  $N$ . (g)-(l) Corresponding false-positive (▲) and false-negative (▼) rates.

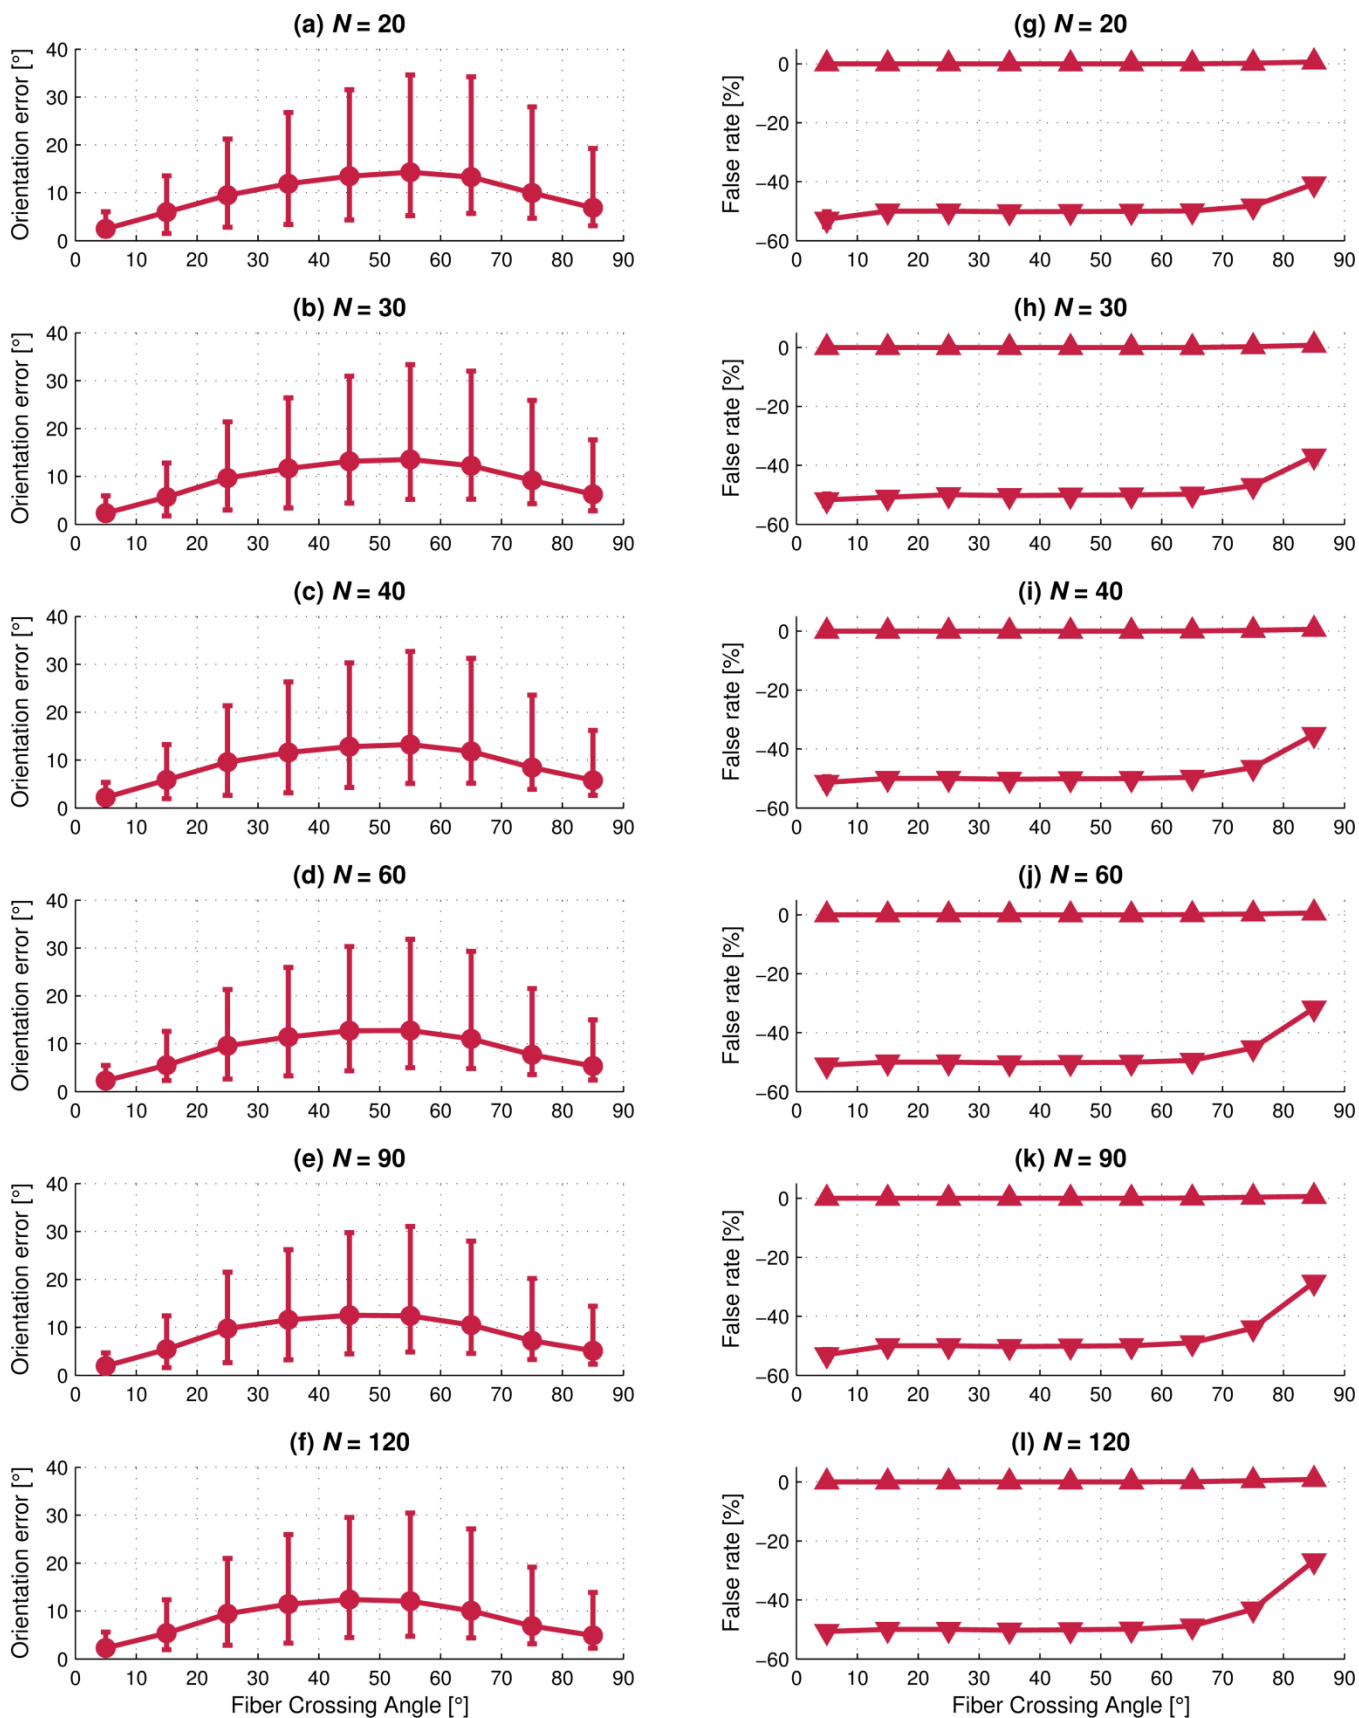

Fig. S4. Two-fiber estimation versus fiber crossing angle, for QBI method. Error bars extend to the mean of samples above and below the filled marker (mean of all data points). (a)-(f) Individual fiber orientation error, with increasing  $N$ . (g)-(l) Corresponding false-positive ( $\blacktriangle$ ) and false-negative ( $\blacktriangledown$ ) rates.

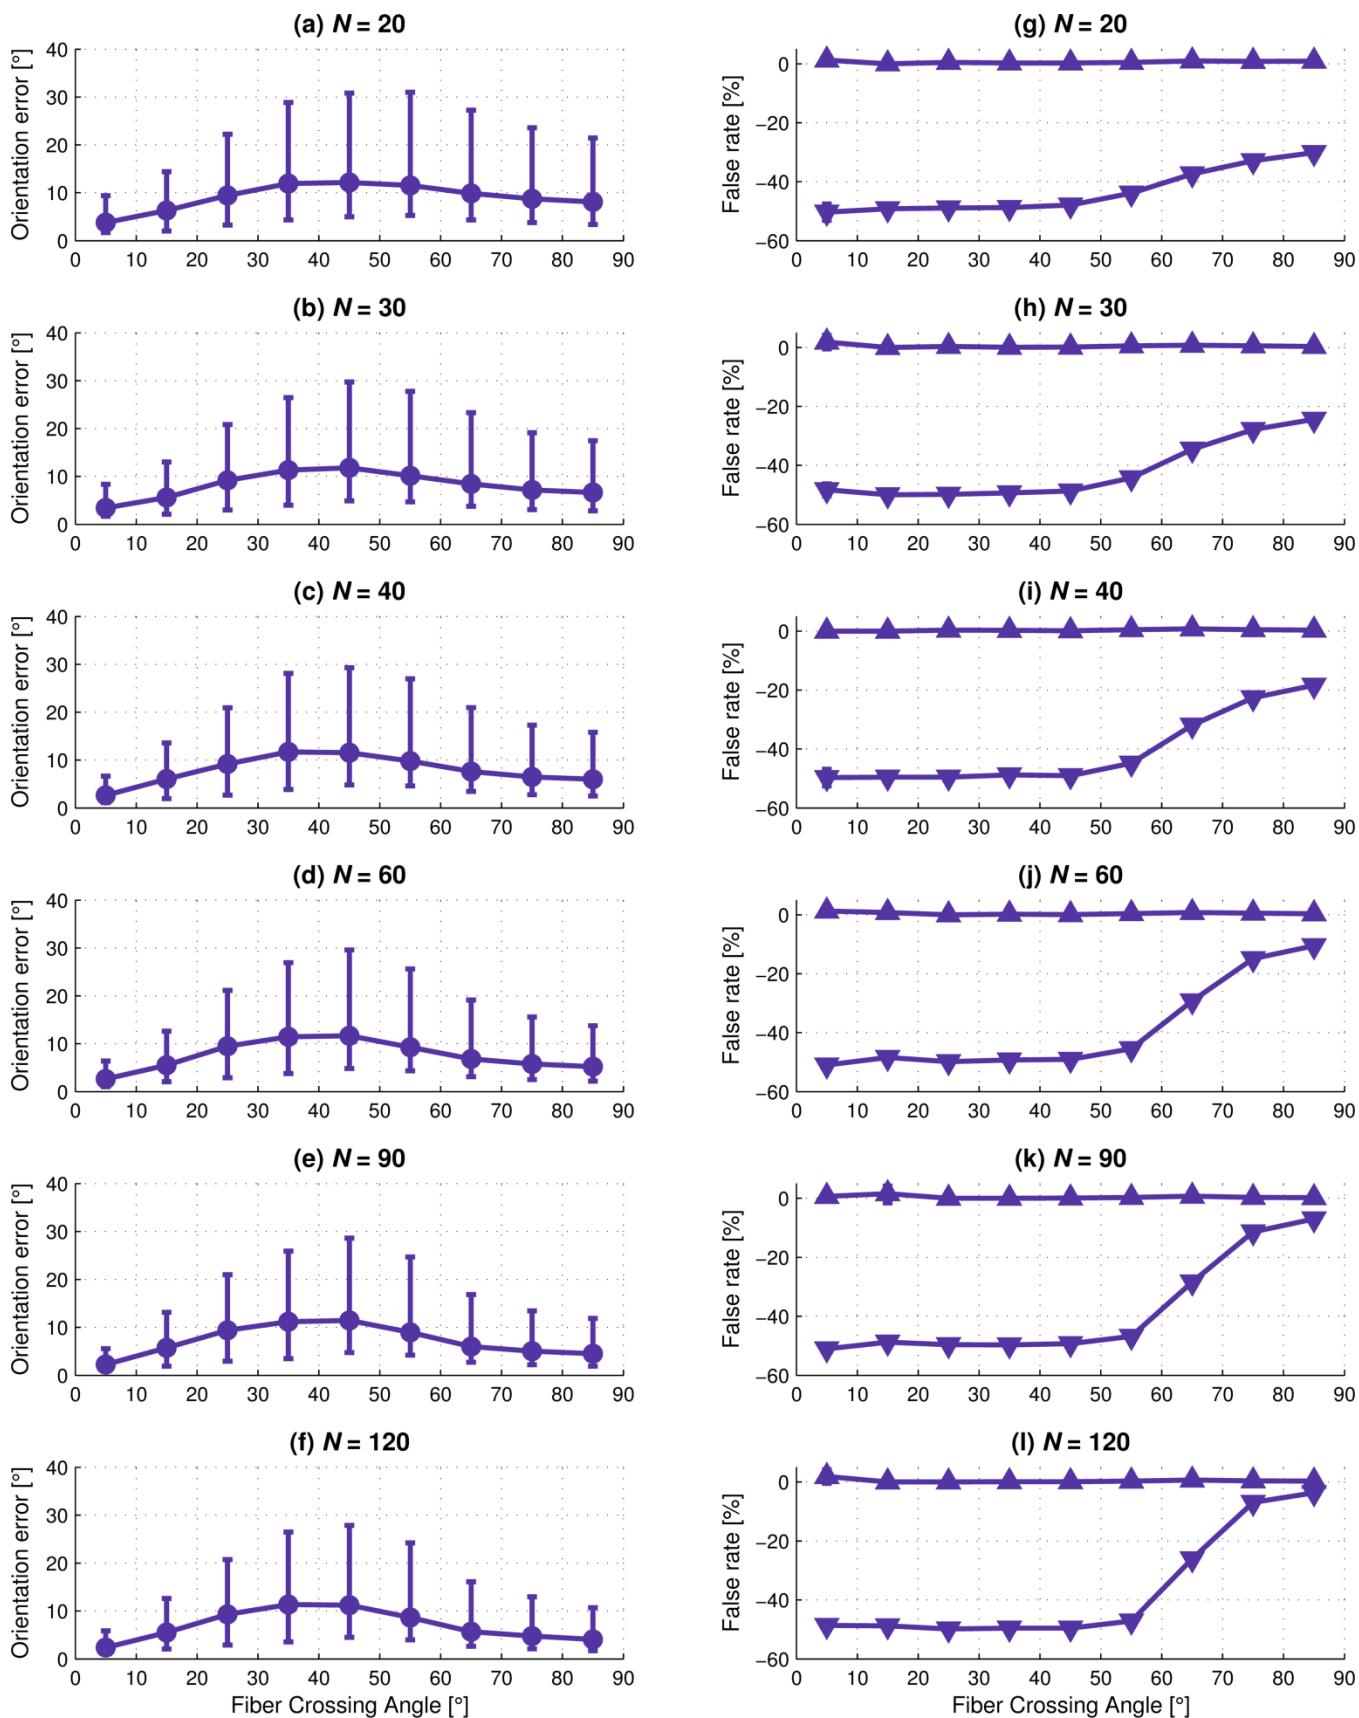

Fig. S5. Two-fiber estimation versus fiber crossing angle, for CSA method. Error bars extend to the mean of samples above and below the filled marker (mean of all data points). (a)-(f) Individual fiber orientation error, with increasing  $N$ . (g)-(l) Corresponding false-positive (▲) and false-negative (▼) rates.

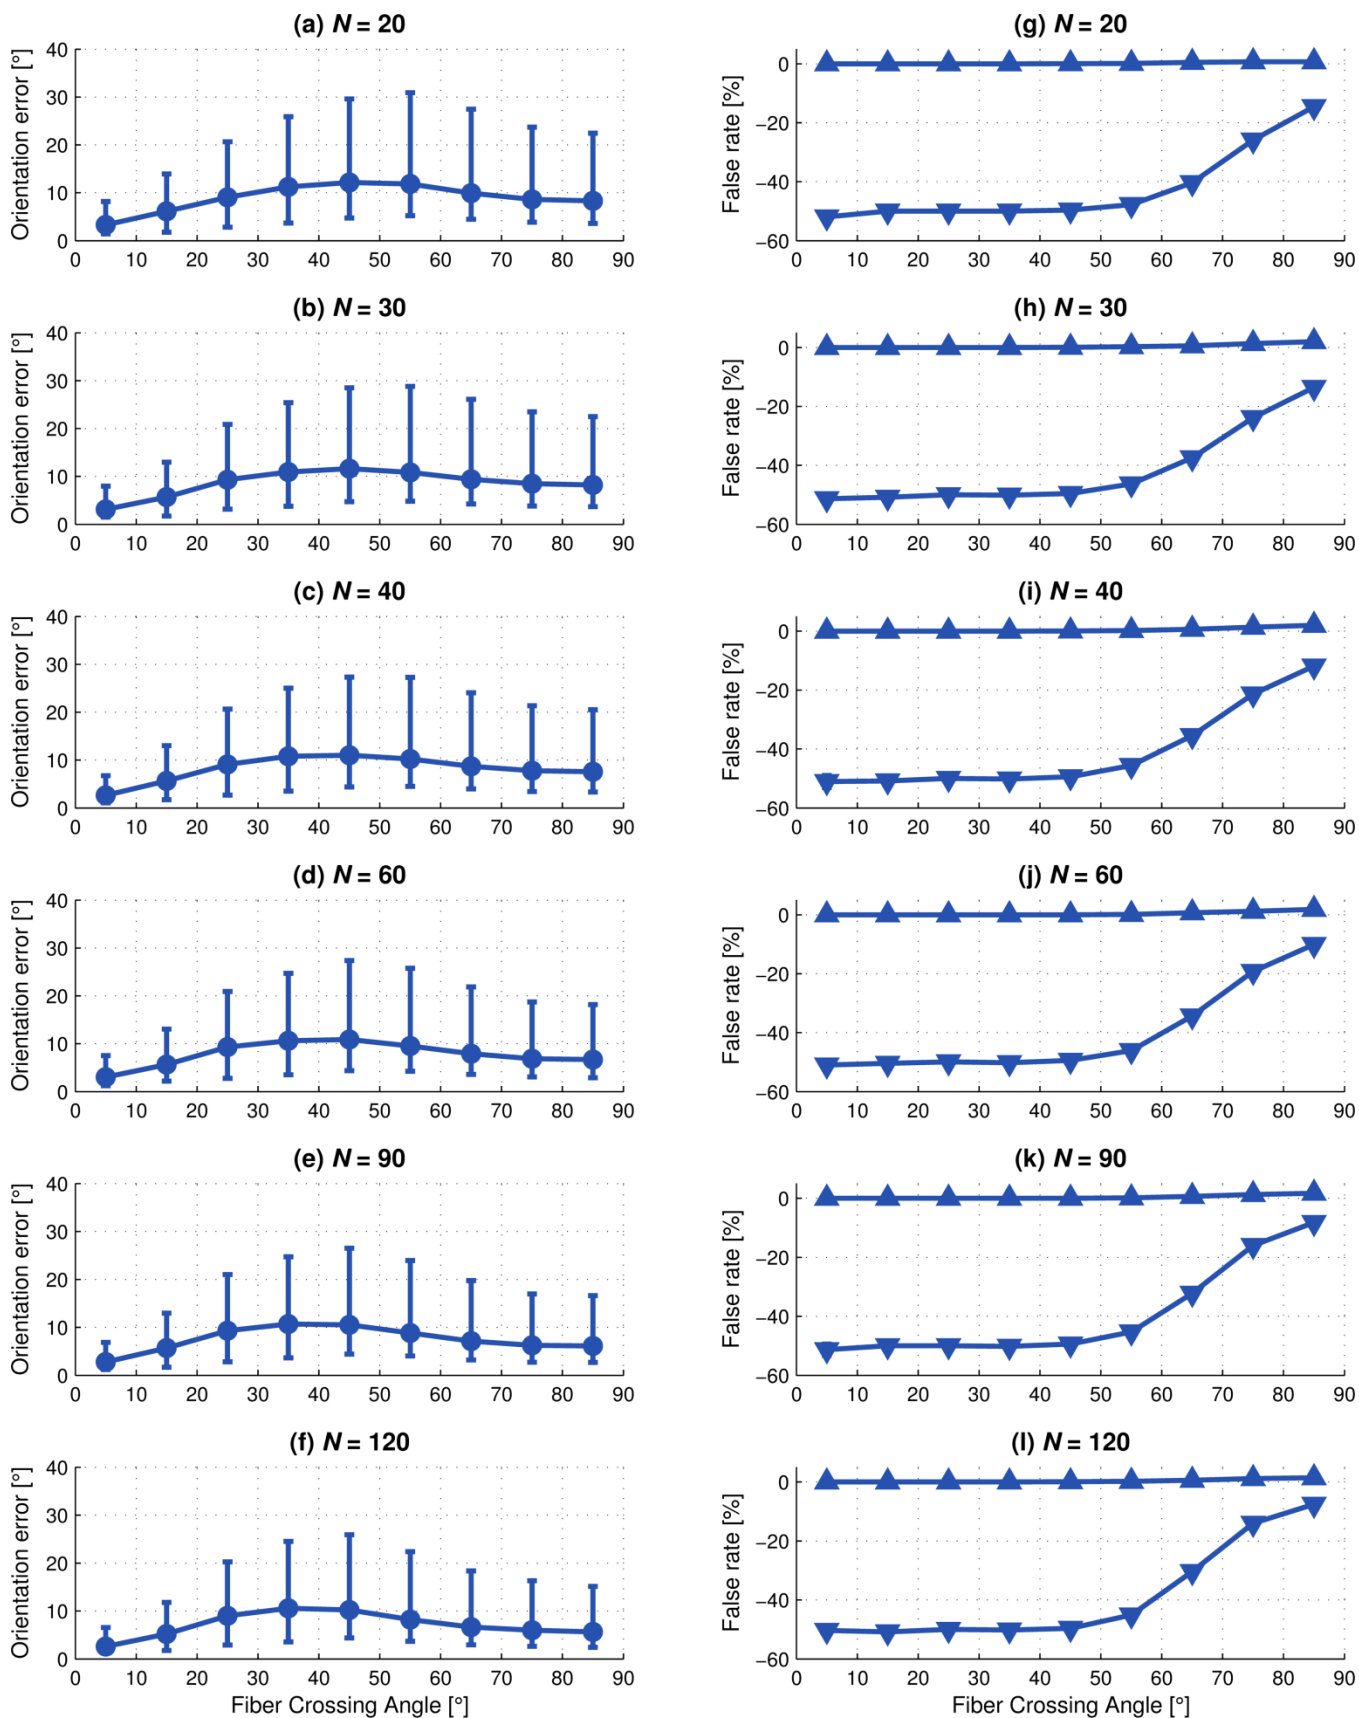

Fig. S6. Two-fiber estimation versus fiber crossing angle, for FRACT method. Error bars extend to the mean of samples above and below the filled marker (mean of all data points). (a)-(f) Individual fiber orientation error, with increasing  $N$ . (g)-(l) Corresponding false-positive (▲) and false-negative (▼) rates.

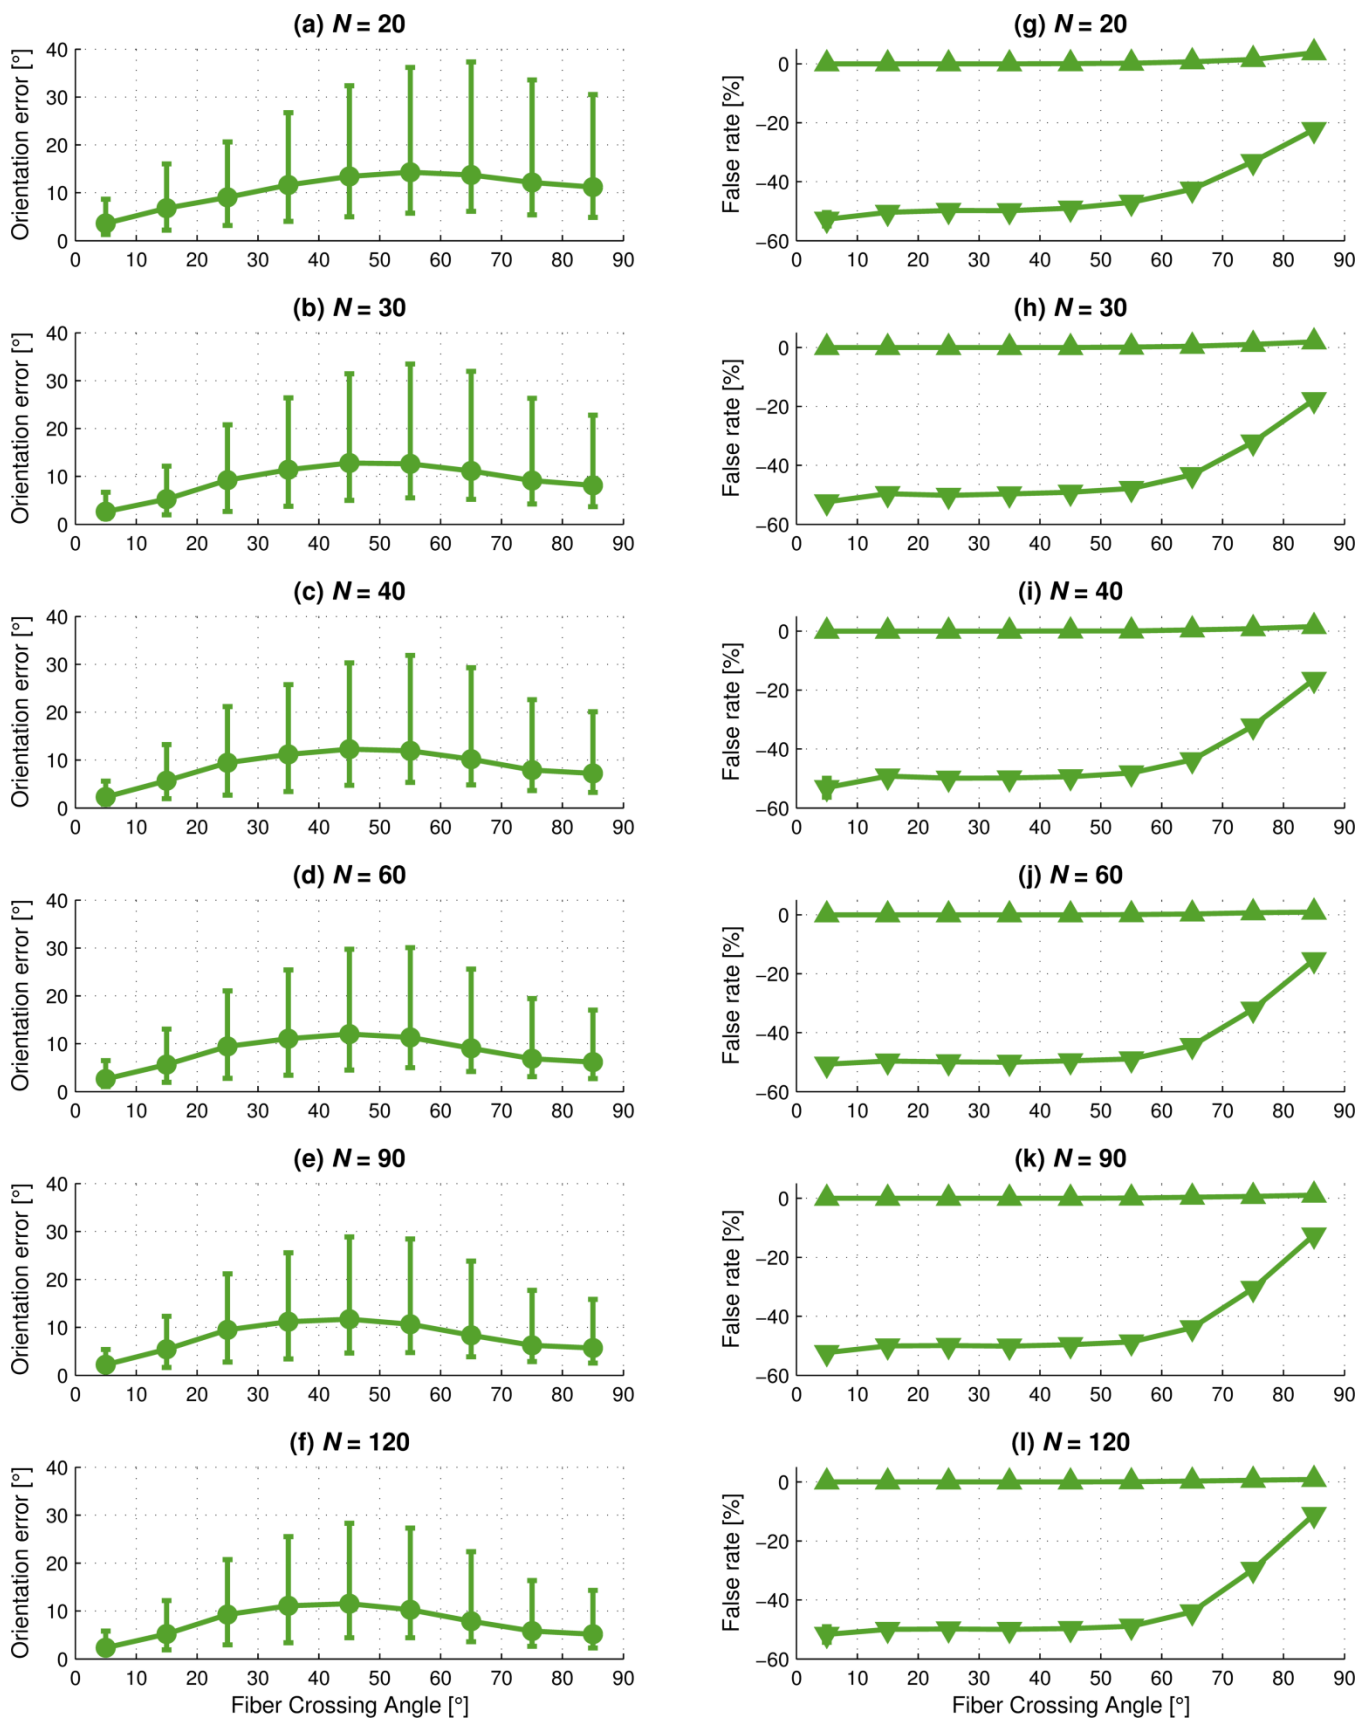

Fig. S7. Two-fiber estimation versus fiber crossing angle, for GQI method. Error bars extend to the mean of samples above and below the filled marker (mean of all data points). (a)-(f) Individual fiber orientation error, with increasing  $N$ . (g)-(l) Corresponding false-positive (▲) and false-negative (▼) rates.



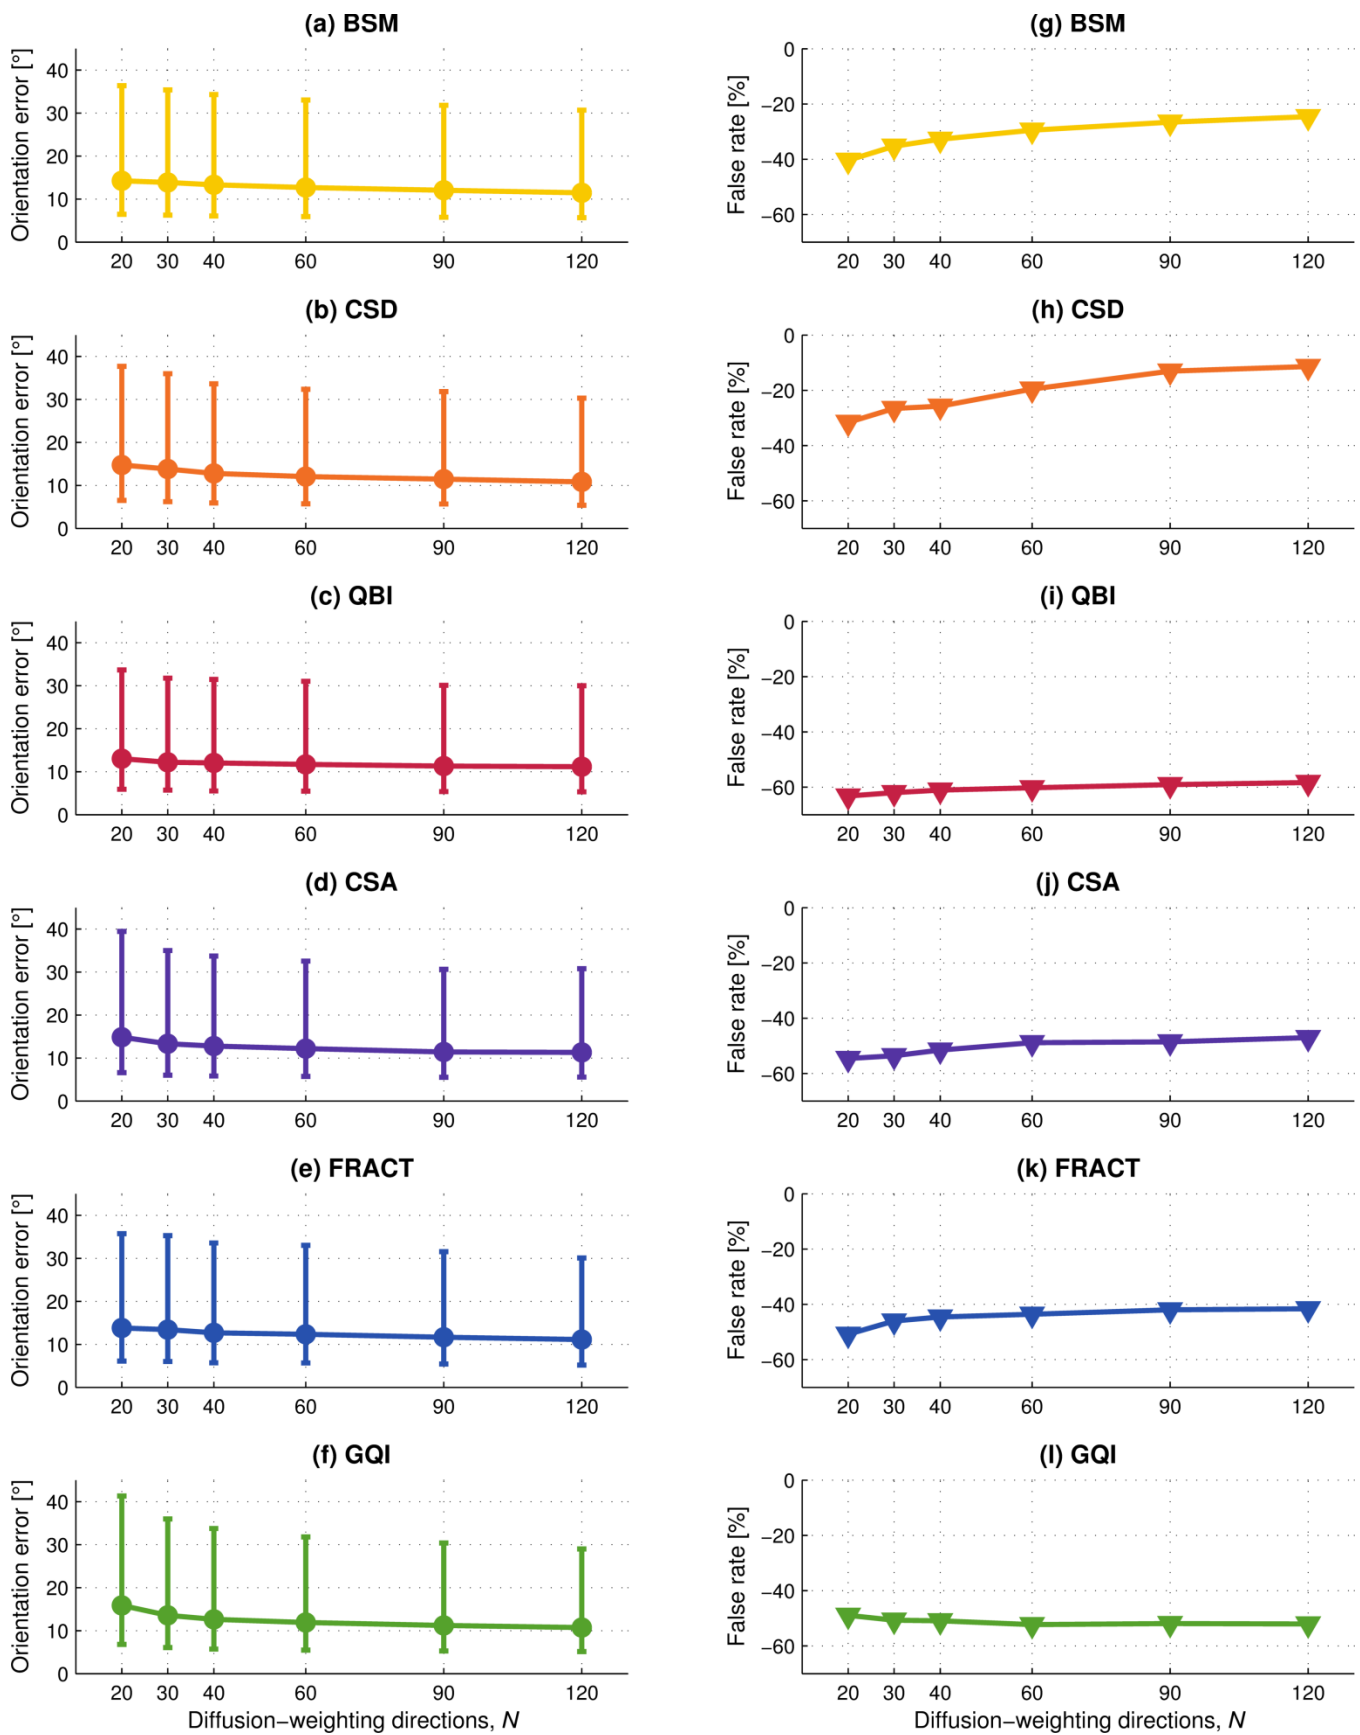

Fig. S8. Three-fiber estimation versus number of diffusion-weighting directions,  $N$ . Error bars extend to the mean of samples above and below the filled marker (mean of all data points). (a)-(f) Individual fiber orientation error for each method. (g)-(l) Corresponding false-negative rate.
